# Supplementary material for: Universal broad-spectrum mucosal vaccine design for human coronaviruses inspired by artificial antibodies
Source: Research Square preprint supplement (doi:10.21203/rs.3.rs-7498404/v1), 2025-10-12
Supplement: Supplementary file 1 [file 30e09c3207c95e5189748336.docx]

Supplementary Materials for

Universal broad-spectrum mucosal vaccine design for human coronaviruses inspired by artificial antibodies

**Authors:** Yan Wu, Jia Lu, Lijuan Fang, Xinlan Chen, Chenshu Zhao, Zhongfa Zhang, Xuerui Zhu, Xiao Gao, Haoyu Li, Yingrui Yan, Jian Shi, Jing Zhang, Pengfei Zhou, Xiaoyan Pan***

**Correspondence:* [*panxy@wh.iov*](mailto:panxy@wh.iov)

**
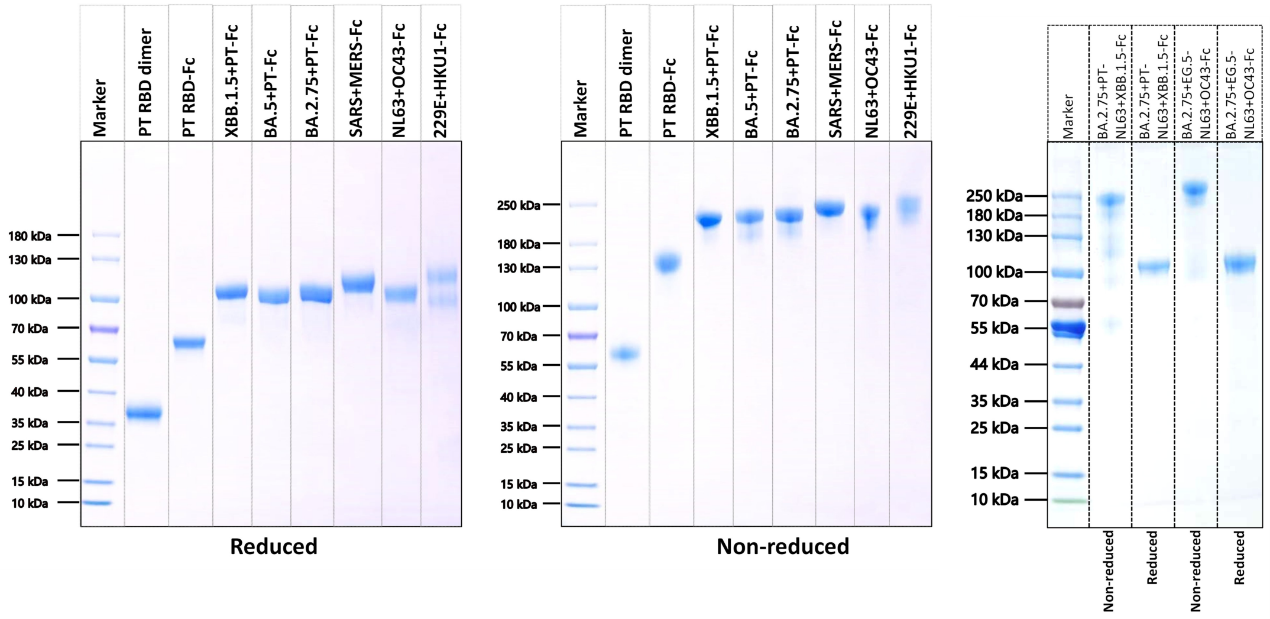
**

**fig. S1 Antigen detection by reduced and non-reduced SDS-PAGE.** Electrophoretic analysis of the antigens in this study (2 μg each) after Coomassie light blue staining.


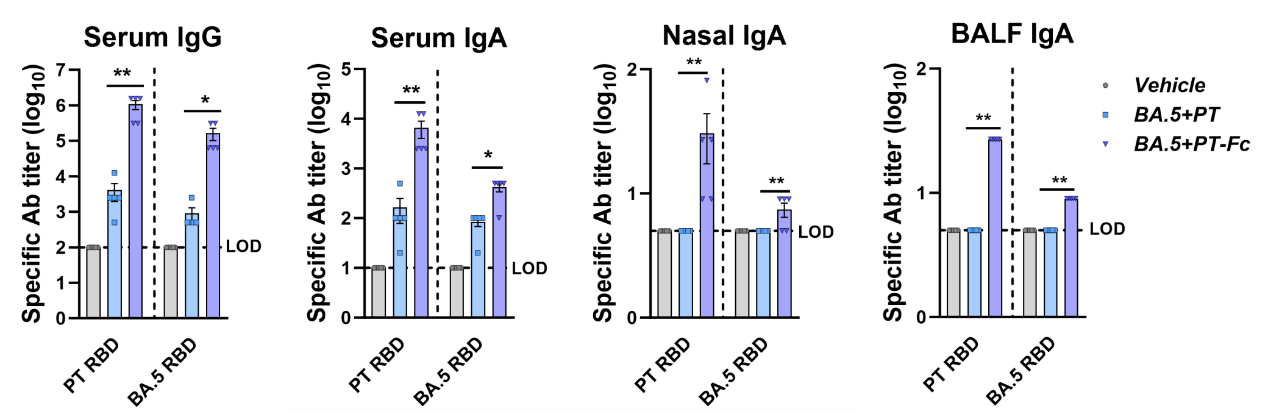


**fig. S2 Fc triggers a robust antibody response to RBDs.** Female BALB/c mice (*n* = 5) were vaccinated with equal molar mass (~0.008 nM) of naked BA.5+PT (~0.4 μg) and BA.5+PT -Fc (~0.6 μg) antigens, according to the same scheme as XBB.1.5+PT-Fc; two weeks post-vaccination, specific antibody titers were detected in sera, nasal and bronchoalveolar lavage fluid samples using ELISA. The limit of detection (LOD) was established as follows: 100 for serum IgG, 10 for serum IgA, 5 for nasal and BALF IgA.


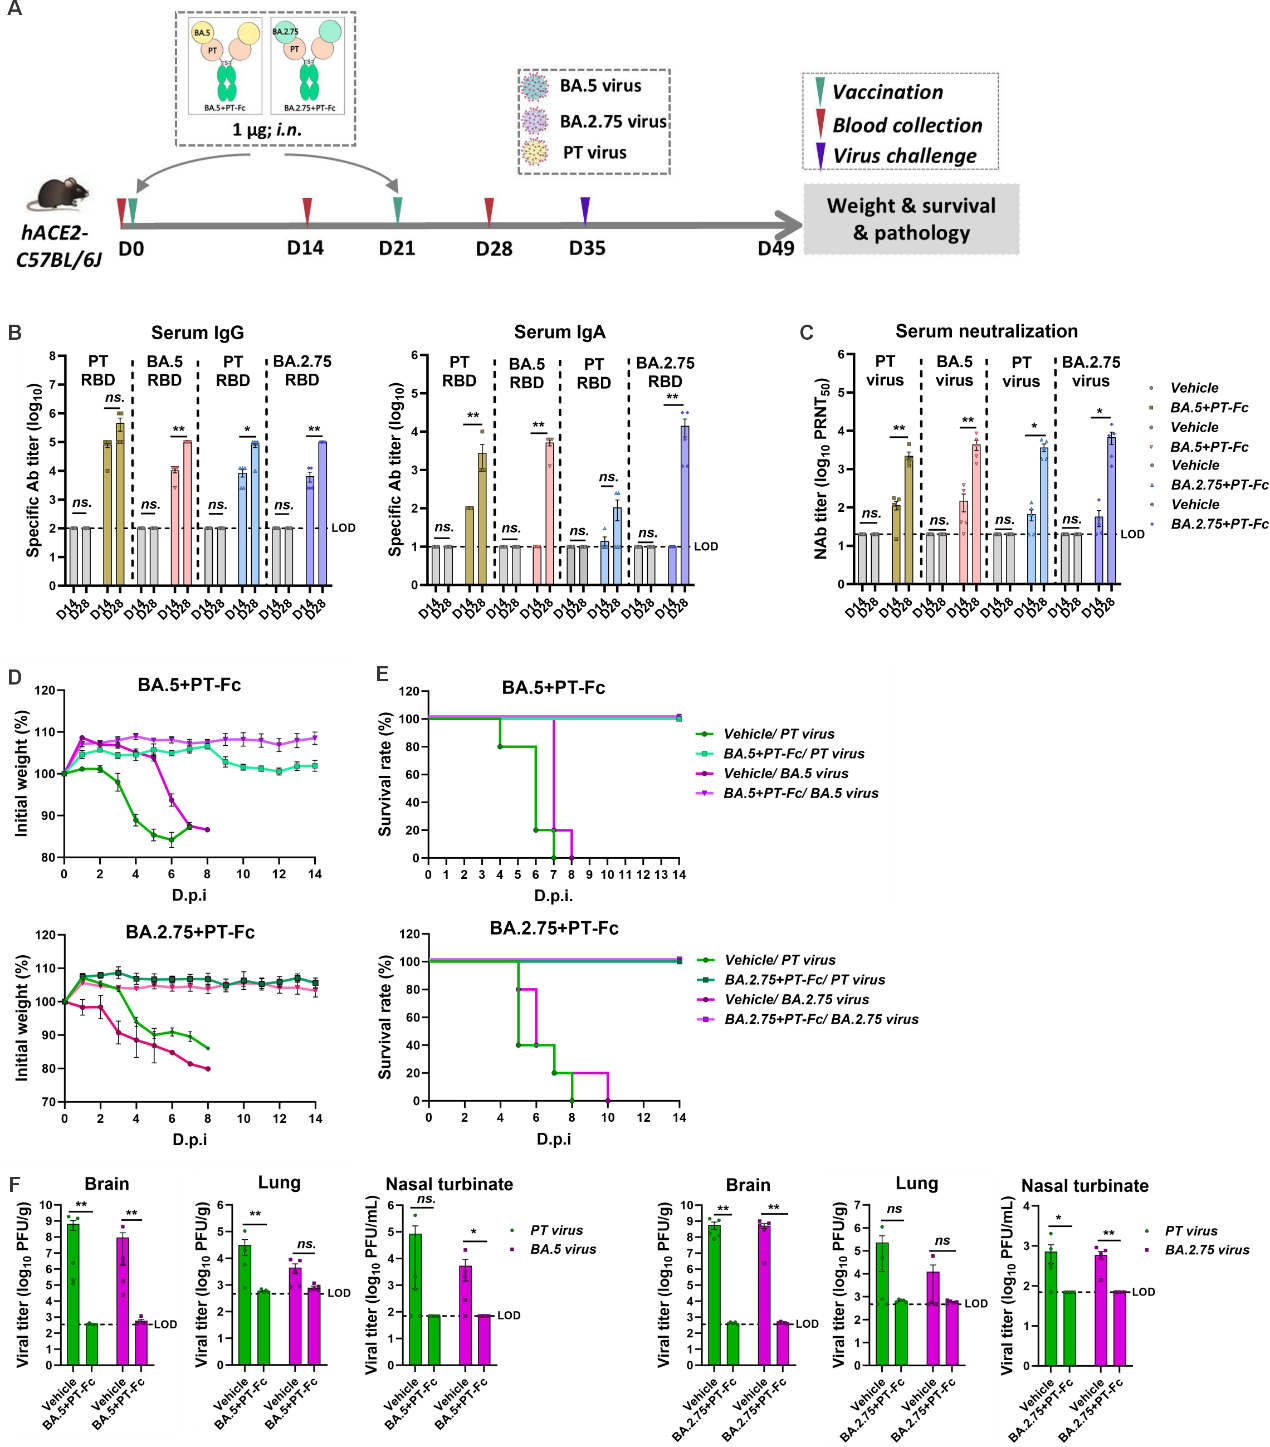


**fig. S3 Two bivalent antigens achieve complete cross-protection in a lethal challenge model.** (**A**) Immunization and challenge experimental scheme. Adult hACE2-trangenic C57BL6/J mice (*n* = 5) were intranasally vaccinated with 1 μg of BA.5+PT-Fc or BA.2.75+PT-Fc adjuvanted with CF501. Mice were vaccinated using a two-dose scheme, and serum samples were collected every two weeks for antibody detection. A lethal dose of SARS-CoV-2 (PT, BA.5, and BA.2) was administered intranasally two weeks after the second dose. Body weight and survival were monitored for two weeks, and brain, lung, and turbinate tissues were collected from the endpoint animals for viral load detection and pathological examination. (**B**) Sera IgG and IgA cross-binding detection against RBDs (PT, BA.5, and BA.2.75) after the first and second doses. The limit of detection (LOD) for serum IgG and IgA was 100 and 10, respectively. (**C**) PRNT50 tested against authentic SARS-CoV-2 variants, including PT, BA.5, and BA.2. The LOD was 20. (**D**, **E**) Body weight (D) and survival (E), with vehicle groups as controls. (**F**) Viral loads in the brain, lungs, and turbinates at the experimental endpoint, the LOD for brain, lung, and turbinate was 350, 466 and 70 PUF/g, respectively. ns: *p* > 0.05, **p* < 0.05, ***p* < 0.01.
